# Supplementary material for: One-pot synthesis of 5-hydroxymethylfurfural from carbohydrates using an inexpensive FePO4 catalyst
Source: Royal Society of Chemistry journal article supplement (doi:10.1039/c4ra16145a), 2015-01-01
Supplement: c4ra16145a1.pdf [file c4ra16145a1.pdf]

## Supporting Information

### One-pot synthesis of 5-hydroxymethylfurfural from carbohydrates using an inexpensive FePO<sub>4</sub> catalyst

Li Yang, Xiaopei Yan, Siquan Xu, Hao Chen, Haian Xia\*, Songlin Zuo

To further understand the “phase-transfer” phenomenon, we carried out a series of control experiments, as shown in Table 1. As can be seen, the aqueous solutions which were obtained by immediately filtered upon cooling to the room temperature, contain high concentration FePO<sub>4</sub> (2.13 mg/mL dissolved at 160 °C for 30 min, Table 1, entry 5) before the occurrence of precipitation because the precipitation process is a very slow process. After the storage of 48 h, the dissolved FePO<sub>4</sub> would be slowly precipitated to get the final solution (the Fe<sup>3+</sup> concentration was less than 0.009 mg/mL, Table 1, entry 5). So, the “phase-transfer” behavior refers to a part of insoluble solid FePO<sub>4</sub> will begin to dissolve in aqueous solution upon elevating the reaction temperature, i.e. the transfer from solid phase to aqueous phase. The Fe<sup>3+</sup> ions are not dissolved in THF phase.

Table 1 The solubility of FePO<sub>4</sub> at different conditions and the final Fe<sup>3+</sup> concentration<sup>a</sup>

| Entry | Time/min | T/°C | Insoluble solid/mg | Solubility<br>/mg.mL <sup>-1</sup> <sup>b</sup> | Final Fe <sup>3+</sup><br>concentration/mg.mL <sup>-1</sup> <sup>c</sup> |
|-------|----------|------|--------------------|-------------------------------------------------|--------------------------------------------------------------------------|
| 1     | 15       | 140  | 135.0              | 1.65                                            | 0.0043                                                                   |
| 2     | 30       | 140  | 136.0              | 1.70                                            | 0.0071                                                                   |
| 3     | 60       | 140  | 132.0              | 1.73                                            | 0.0074                                                                   |
| 4     | 15       | 160  | 123.0              | 1.98                                            | 0.0060                                                                   |
| 5     | 30       | 160  | 123.0              | 2.13                                            | 0.0090                                                                   |

<sup>a</sup>The experimental condition: 0.2 g FePO<sub>4</sub>, 10 mL distilled water, 30 mL THF, 3.5 g NaCl

<sup>b</sup>The solubility was calculated by the dissolved FePO<sub>4</sub> mass divided into the volume of water phase. After the temperature was cooled to room temperature, the reaction solution was immediately taken out and then was filtered to obtain the aqueous phase and THF phase. Subsequently, the water phase was obtained by separating THF phase.

<sup>c</sup>The filtrate was stored for 48 h to fully precipitate the soluble FePO<sub>4</sub> and then Fe<sup>3+</sup> concentration was determined by atom absorbance spectroscopy (AAS)
